# Supplementary material for: Non-BRCA1/BRCA2 High-Risk Familial Breast Cancers are Not Associated with a High Prevalence of BRCAness
Source: Research Square preprint supplement (doi:10.21203/rs.3.rs-827829/v1), 2021-08-26
Supplement: Supplementary file 1 [file 6ce1d3dcf6a366a705650409.xlsx]

## Sheet: S1 - Patient information
Supplementary Table S1 - Patient Information
SampleID	FamilyID	Group	PAM50 subtype	ER	PR	HER2	Age 1st breast cancer	Age 2nd breast cancer	Age ovarian cancer	BRCA1 methylation	BOADICEA BC Risk 20-80 years	Polygenic Risk Score (PRS)	Total breast cancer cases in family	Total ovarian cancer cases in family
3	F1	BRCAx	LumA	1	1	0	68	NA	NA	0	0.3264650	0.103964	5	0
7	F2	BRCAx	LumB	1	0	0	50	NA	NA	0	0.1884693	0.121017	2	0
9	F4	BRCAx	LumA	1	1	0	55	NA	NA	0	0.1863387	0.126634	2	0
10	F5	BRCAx	Basal	0	0	0	47	49	NA	1	0.1612735	0.150245	4	0
11	F6	BRCAx	Basal	0	0	0	32	NA	NA	0	0.1083470	0.115004	1	2
12	F7	BRCAx	Her2	1	0	1	29	29	NA	0	0.1114375	0.101562	2	0
14	F9	BRCAx	LumA	1	1	0	34	NA	NA	0	0.1096914	0.149354	3	0
16	F10	BRCAx	LumA	1	1	0	38	41	NA	0	0.1226577	0.0753825	3	0
17	F11	BRCAx	LumA	1	1	0	48	NA	NA	0	0.1505860	0.11119	5	0
18	F12	BRCAx	LumA	1	1	0	50	NA	NA	0	0.1953757	0.0917384	6	0
19	F13	BRCAx	LumA	1	1	0	51	NA	NA	0	0.1867859	0.111023	5	1
21	F14	BRCAx	Her2	0	0	1	61	NA	NA	0	0.1689934	0.0877586	5	0
23	F16	BRCAx	Basal	0	0	1	42	NA	NA	0	0.1127409	0.161763	1	2
25	F18	BRCAx	LumA	1	1	1	48	51	NA	NA	0.1578746	0.0804048	3	0
31	F19	BRCAx	LumB	1	1	0	33	NA	NA	0	0.1668169	0.128064	2	0
32	F20	BRCAx	Basal	0	0	0	47	NA	NA	0	0.1547300	0.122152	2	1
33	F21	BRCAx	LumA	1	1	0	41	NA	NA	0	0.2113731	0.136526	4	1
34	F21	BRCAx	LumA	1	1	0	59	NA	NA	0	0.2753815	0.135806	3	0
35	F22	BRCAx	LumB	1	1	0	46	NA	NA	NA	0.1984202	0.136462	3	0
36	F22	BRCAx	LumB	1	1	0	62	68	NA	0	0.1638330	0.137125	4	0
37	F23	BRCAx	Basal	0	0	0	45	NA	NA	1	0.1558369	0.0979028	4	0
38	F24	BRCAx	LumB	1	1	0	41	NA	NA	0	0.2179283	0.13023	3	0
39	F25	BRCAx	LumA	1	1	0	54	73	NA	0	0.3953598	0.218886	4	0
40	F26	BRCA1	Basal	0	0	0	36	NA	NA	NA	0.1154051	0.0897426	NA	NA
41	F27	BRCA1	LumB	1	1	0	28	NA	NA	NA	0.1154051	0.165056	NA	NA
42	F28	BRCA1	Basal	0	0	0	37	NA	NA	NA	0.1136964	0.0982369	NA	NA
43	F29	BRCA1	Basal	0	0	0	40	NA	NA	NA	0.1136964	0.0963882	NA	NA
45	F30	BRCA2	LumB	1	1	0	66	NA	NA	NA	0.1027598	0.102111	NA	NA
46	F31	BRCA2	LumB	1	1	0	36	NA	NA	NA	0.1175751	0.0940671	NA	NA
47	F32	BRCA2	LumB	1	1	0	37	73	NA	NA	0.1154051	0.0814148	NA	NA
