# Supplementary material for: Non-BRCA1/BRCA2 High-Risk Familial Breast Cancers are Not Associated with a High Prevalence of BRCAness
Source: Research Square preprint supplement (doi:10.21203/rs.3.rs-827829/v1), 2021-08-26
Supplement: Supplementary file 2 [file d6eb854d4ca0c85ad5326595.xlsx]

## Sheet: Germline variants
Supplementary Table S6 - Germline Variants
Sample	Gene Names	Chr:Pos	Ref/Alt	Sequence Ontology	HGVS c.	HGVS p.	Variant Allele Freq (VAF)	Allelic Depths (AD)	Zygosity	GnomAD VAF	ExAC VAF	N of 6 Predicted Damaging1	CADD Score	ClinVar	Classification
3	WRN	8:30969150	C/G	missense_variant	NM_000553.6:c.2108C>G	NP_000544.2:p.Thr703Ser	0.46	27,23	Heterozygous	7.95583e-05	9.55231e-05	4 of 6 Predicted as Damaging	24	Uncertain significance (1)	Unknown Significance
3	RET	10:43615063	A/C	missense_variant	NM_020975.6:c.2477A>C	NP_066124.1:p.Tyr826Ser	0.491525	30,29	Heterozygous	4.41639e-05	3.18979e-05	3 of 6 Predicted as Damaging	22.6	Uncertain significance (6)	Unknown Significance
3	SUFU	10:104352413	A/G	missense_variant	NM_016169.3:c.529A>G	NP_057253.2:p.Met177Val	0.692308	12,27	Heterozygous	2.78434e-05	NA	5 of 6 Predicted as Damaging	24.8	Uncertain significance (3)	Unknown Significance
7	CHEK2	22:29130450	TCCTCAGGTTCTTGG/-	inframe_deletion	NM_007194.4:c.246_260delCCAAGAACCTGAGGA	NP_009125.1:p.Asp82_Glu86del	0.65625	11,21	Heterozygous	0.000147155	0.000159418	NA	16.8	Likely Benign(1),Uncertain Significance(9)	Unknown Significance
7	BLM	15:91304099	C/T	missense_variant	NM_000057.4:c.1496C>T	NP_000048.1:p.Ser499Phe	0.489362	24,23	Heterozygous	1.59776e-05	NA	4 of 6 Predicted as Damaging	25.8	Uncertain significance (2)	Unknown Significance
9	RINT1	7:105190919	C/T	missense_variant	NM_021930.6:c.1319C>T	NP_068749.3:p.Thr440Met	0.641026	14,25	Heterozygous	1.59139e-05	3.18552e-05	4 of 6 Predicted as Damaging	27.7	NA	Unknown Significance
9	FANCD2,FANCD2OS	3:10133886	T/-	frameshift_variant	NM_033084.5:c.3799delT,NM_173472.2:c.*44-10671delA	NP_149075.2:p.Tyr1267Thrfs*15,	0.446809	26,21	Heterozygous	1.19316e-05	NA	NA	35	NA	Unknown Significance
10	POLE	12:133257789	G/A	missense_variant	NM_006231.4:c.139C>T	NP_006222.2:p.Arg47Trp	0.606061	13,20	Heterozygous	0.000787364	0.000796533	4 of 6 Predicted as Damaging	26.7	Likely Benign(2),Uncertain Significance(5)	Unknown Significance
10	RBBP8	18:20548849	G/A	missense_variant	NM_002894.3:c.329G>A	NP_002885.1:p.Arg110Gln	0.642857	10,18	Heterozygous	0.000394319	0.000318939	4 of 6 Predicted as Damaging	25.5	NA	Unknown Significance
10	KIF1B	1:10381811	C/T	missense_variant	NM_015074.3:c.2116C>T	NP_055889.2:p.Arg706Trp	0.47619	22,20	Heterozygous	2.78419e-05	NA	5 of 6 Predicted as Damaging	31	NA	Unknown Significance
10	ERCC2	19:45871914	G/C	missense_variant	NM_000400.3:c.334C>G	NP_000391.1:p.Arg112Gly	0.457143	19,16	Heterozygous	NA	3.18512e-05	5 of 6 Predicted as Damaging	24.9	NA	Unknown Significance
10	RAD51D	17:33430272	C/T	splice_donor_variant	NM_002878.3:c.738+1G>A	NA	0.529412	16,18	Heterozygous	NA	NA	2 of 6 Predicted as Damaging	33	Likely pathogenic (2)	Likely Pathogenic
10	KIF1B	1:10435018	A/C	missense_variant	NM_015074.3:c.5065A>C	NP_055889.2:p.Ser1689Arg	0.5	12,12	Heterozygous	NA	NA	5 of 6 Predicted as Damaging	24.9	NA	Unknown Significance
11	RAD51D	17:33445581	C/T	missense_variant	NM_002878.3:c.202G>A	NP_002869.3:p.Gly68Ser	0.586957	19,27	Heterozygous	3.57918e-05	NA	5 of 6 Predicted as Damaging	22.1	Uncertain significance (3)	Unknown Significance
12	TP53	17:7577081	T/C	missense_variant	NM_000546.5:c.857A>G	NP_000537.3:p.Glu286Gly	0.5	19,19	Heterozygous	NA	NA	6 of 6 Predicted as Damaging	24.6	Uncertain significance (1),Likely pathogenic (15)	Likely Pathogenic
13	CYLD	16:50783664	C/T	missense_variant	NM_015247.2:c.55C>T	NP_056062.1:p.Arg19Trp	0.465116	23,20	Heterozygous	1.20492e-05	9.55901e-05	4 of 6 Predicted as Damaging	23	NA	Unknown Significance
13	PTEN	10:89624161	A/C	missense_variant	NM_000314.8:c.-66A>C	NA	0.53125	15,17	Heterozygous	NA	3.18613e-05	NA	21.1	NA	Unknown Significance
14	PMS1	2:190738359	C/T	missense_variant	NM_000534.4:c.2611C>T	NP_000525.1:p.Arg871Cys	0.45	22,18	Heterozygous	1.59556e-05	NA	5 of 6 Predicted as Damaging	32	NA	Unknown Significance
16	NF1	17:29576036	C/T	missense_variant	NM_000267.3:c.4009C>T	NP_000258.1:p.Arg1337Trp	0.44898	27,22	Heterozygous	2.38861e-05	NA	4 of 6 Predicted as Damaging	29.1	Uncertain significance (3)	Unknown Significance
18	TERT	5:1293767	G/A	missense_variant	NM_198253.3:c.1234C>T	NP_937983.2:p.His412Tyr	0.6	22,33	Heterozygous	0.00326544	0.00315367	5 of 6 Predicted as Damaging	17.17	Pathogenic (1),Benign/Likely benign (3),Likely benign (6),Benign (1)	Unknown Significance
18	SMARCA4	19:11169019	G/A	missense_variant	NM_001128849.2:c.4609G>A	NP_001122321.1:p.Val1537Met	0.458333	26,22	Heterozygous	3.58649e-05	NA	3 of 6 Predicted as Damaging	23.3	Uncertain significance (2)	Unknown Significance
21	MET	7:116340039	A/G	missense_variant	NM_001127500.3:c.901A>G	NP_001120972.1:p.Thr301Ala	0.611111	14,22	Heterozygous	0.000289277	0.000286588	4 of 6 Predicted as Damaging	22.2	Likely Benign(1),Uncertain Significance(2)	Unknown Significance
25	FANCC	9:98011545	C/T	missense_variant	NM_000136.3:c.29G>A	NP_000127.2:p.Cys10Tyr	0.485714	18,17	Heterozygous	0.000498345	0.000159246	1 of 6 Predicted as Damaging	15.65	Uncertain significance (6)	Unknown Significance
25	FANCG	9:35075014	C/T	missense_variant	NM_004629.1:c.1546G>A	NP_004620.1:p.Ala516Thr	0.595238	17,25	Heterozygous	1.59058e-05	NA	4 of 6 Predicted as Damaging	23.8	NA	Unknown Significance
31	HOXB13	17:46805705	C/T	missense_variant	NM_006361.5:c.251G>A	NP_006352.2:p.Gly84Glu	0.675676	12,25	Heterozygous	0.00184341	0.00217225	5 of 6 Predicted as Damaging	27.9	Pathogenic (2),Pathogenic/Likely pathogenic, risk factor (3),Likely pathogenic (1)	Likely Pathogenic
33	ATM	11:108168076	G/T	missense_variant	NM_000051.3:c.4972G>T	NP_000042.3:p.Ala1658Ser	0.585366	17,24	Heterozygous	NA	NA	2 of 6 Predicted as Damaging	22.8	Uncertain significance (1)	Unknown Significance
34	SLX4	16:3658907	A/-	frameshift_variant	NM_032444.4:c.59delT	NP_115820.2:p.Leu20Argfs*24	0.5	22,22	Heterozygous	NA	NA	NA	22.7	Pathogenic (1)	Pathogenic
35	MSH6	2:48026935	A/G	missense_variant	NM_000179.2:c.1813A>G	NP_000170.1:p.Thr605Ala	0.434783	26,20	Heterozygous	7.9841e-06	NA	5 of 6 Predicted as Damaging	23.2	NA	Unknown Significance
35	GREM1	15:33023085	G/A	missense_variant	NM_013372.7:c.194G>A	NP_037504.1:p.Gly65Asp	0.5	19,19	Heterozygous	NA	NA	3 of 6 Predicted as Damaging	24.6	NA	Unknown Significance
36	MSH6	2:48026935	A/G	missense_variant	NM_000179.2:c.1813A>G	NP_000170.1:p.Thr605Ala	0.575	17,23	Heterozygous	7.9841e-06	NA	5 of 6 Predicted as Damaging	23.2	NA	Unknown Significance
37	NF1	17:29528158	A/G	missense_variant	NM_000267.3:c.1166A>G	NP_000258.1:p.His389Arg	0.595238	17,25	Heterozygous	7.9564e-05	3.18471e-05	3 of 6 Predicted as Damaging	21.3	Likely Benign(2),Uncertain Significance(8)	Unknown Significance
37	SEC23B	20:18529314	C/T	missense_variant	NM_006363.6:c.1805C>T	NP_006354.2:p.Ser602Leu	0.567568	16,21	Heterozygous	2.78394e-05	3.18512e-05	5 of 6 Predicted as Damaging	24.8	NA	Unknown Significance
37	ATM	11:108151838	G/C	missense_variant	NM_000051.3:c.3519G>C	NP_000042.3:p.Leu1173Phe	0.372093	27,16	Heterozygous	NA	NA	4 of 6 Predicted as Damaging	24.2	Uncertain significance (2)	Unknown Significance
37	SPINK1	5:147211193	G/A	5_prime_UTR_premature_start_codon_gain_variant	NM_003122.4:c.-53C>T	NP_003113.2:p.Met1ext-18	0.607143	11,17	Heterozygous	NA	0.000159226	NA	6.536	Likely Pathogenic(1),Uncertain Significance(2)	Unknown Significance
38	FANCM	14:45633740	T/C	missense_variant	NM_020937.4:c.1760T>C	NP_065988.1:p.Ile587Thr	0.565217	20,26	Heterozygous	0.000115642	3.18492e-05	2 of 6 Predicted as Damaging	24	Uncertain significance (1)	Unknown Significance
38	SMAD9	13:37447016	T/C	missense_variant	NM_001127217.2:c.449A>G	NP_001120689.1:p.Tyr150Cys	0.537037	25,29	Heterozygous	9.55064e-05	9.55414e-05	4 of 6 Predicted as Damaging	22.5	NA	Unknown Significance
38	BIVM-ERCC5,ERCC5	13:103520554	G/A	missense_variant	NM_001204425.1:c.3987G>A,NM_000123.3:c.2625G>A	NP_001191354.1:p.Met1329Ile,NP_000114.2:p.Met875Ile	0.514286	17,18	Heterozygous	NA	NA	4 of 6 Predicted as Damaging	26.7	NA	Unknown Significance
39	CHEK2	22:29091857	G/-	frameshift_variant	NM_007194.4:c.1100delC	NP_009125.1:p.Thr367Metfs*15	0.571429	18,24	Heterozygous	0.00204432	0.0026108	NA	35	Pathogenic(25),Uncertain Significance(1)	Pathogenic
39	GNAS	20:57415543	GAGCCTGAGACCGCCCCCACCACT/-	inframe_deletion	NM_016592.4:c.387_410del	NP_057676.1:p.Ala132_Thr139del	0.5	29,29	Heterozygous	5.61077e-05	0.000127575	NA	22.1	NA	Unknown Significance
39	COL1A1	17:48264061	G/A	missense_variant	NM_000088.3:c.3754C>T	NP_000079.2:p.Arg1252Cys	0.5	32,32	Heterozygous	1.19636e-05	NA	5 of 6 Predicted as Damaging	25	NA	Unknown Significance
39	HOXB13	17:46804367	G/A	missense_variant	NM_006361.5:c.640C>T	NP_006352.2:p.Arg214Cys	0.439024	23,18	Heterozygous	4.02272e-06	NA	6 of 6 Predicted as Damaging	34	NA	Unknown Significance
40	RAD51B	14:68353893	A/G	missense_variant	NM_001321821.1:c.728A>G	NP_001308750.1:p.Lys243Arg	0.552632	17,21	Heterozygous	0.00733544	0.00701307	4 of 6 Predicted as Damaging	26.2	NA	Unknown Significance
40	BRCA1	17:41245992	T/-	frameshift_variant	NM_007300.4:c.1556delA	NP_009231.2:p.Lys519Argfs*13	0.456522	25,21	Heterozygous	NA	NA	NA	25.6	Pathogenic (15)	Pathogenic
41	RECQL	12:21629896	A/T	missense_variant	NM_002907.4:c.898T>A	NP_002898.2:p.Phe300Ile	0.388889	22,14	Heterozygous	0.000116984	0.000159327	2 of 6 Predicted as Damaging	22.3	Uncertain significance (1)	Unknown Significance
41	DICER1	14:95569855	T/C	missense_variant	NM_177438.2:c.3878A>G	NP_803187.1:p.Asn1293Ser	0.388889	22,14	Heterozygous	7.95836e-06	3.18492e-05	4 of 6 Predicted as Damaging	17.97	Uncertain significance (2)	Unknown Significance
41	BRCA1	17:41245073	G/-	frameshift_variant	NM_007300.4:c.2475delC	NP_009231.2:p.Asp825Glufs*21	0.473684	20,18	Heterozygous	3.98546e-06	NA	NA	21	Pathogenic (17)	Pathogenic
42	BRCA1	17:41245073	G/-	frameshift_variant	NM_007300.4:c.2475delC	NP_009231.2:p.Asp825Glufs*21	0.513514	18,19	Heterozygous	3.98546e-06	NA	NA	21	Pathogenic (17)	Pathogenic
42	TSC2	16:2098690	G/A	missense_variant	NM_000548.5:c.74G>A	NP_000539.2:p.Arg25Lys	0.5	22,22	Heterozygous	3.98089e-06	NA	3 of 6 Predicted as Damaging	23.3	Uncertain significance (1)	Unknown Significance
43	BRCA1	17:41209080	-/G	frameshift_variant	NM_007300.4:c.5329dupC	NP_009231.2:p.Gln1777Profs*74	0.466667	16,14	Heterozygous	0.000182907	0.000159246	NA	35	Pathogenic (50),risk factor (1)	Pathogenic
45	BRCA2	13:32912020	AGAC/-	frameshift_variant	NM_000059.3:c.3530_3533delACAG	NP_000050.2:p.Asp1177Alafs*19	0.666667	14,28	Heterozygous	NA	NA	NA	23.2	Pathogenic (3)	Pathogenic
46	RAD51D	17:33445581	C/T	missense_variant	NM_002878.3:c.202G>A	NP_002869.3:p.Gly68Ser	0.413793	17,12	Heterozygous	3.57918e-05	NA	5 of 6 Predicted as Damaging	22.1	Uncertain significance (3)	Unknown Significance
46	BRCA2	13:32914974	ACAA/-	frameshift_variant	NM_000059.3:c.6486_6489delACAA	NP_000050.2:p.Lys2162Asnfs*5	0.648649	13,24	Heterozygous	8.60837e-06	NA	NA	25.1	Pathogenic (17)	Pathogenic
47	BRCA2	13:32914981	AC/-	frameshift_variant	NM_000059.3:c.6490_6491delCA	NP_000050.2:p.Gln2164Valfs*11	0.604651	17,26	Heterozygous	NA	NA	NA	36	NA	Pathogenic
1. dbSNFP functional predictions in Varseq. Includes the predictions from SIFT, Polyphen2, MutationTaster, MutationAssessor, FATHMM, FATHMM MKL
